# Supplementary material for: Anthocyanin concentration depends on the counterbalance between its synthesis and degradation in plum fruit at high temperature
Source: PubMed Central journal article supplement (PMC5550432; doi:10.1038/s41598-017-07896-0), 2017-08-09
Supplement: 41598_2017_7896_MOESM1_ESM.pdf [file 41598_2017_7896_MOESM1_ESM.pdf]

Anthocyanin concentration depends on the counterbalance between its synthesis and degradation in plum fruit at high temperature

Junping Niu<sup>1,#</sup>, Guojing Zhang<sup>1,#</sup>, Wenting Zhang<sup>1</sup>, Vasilij Goltsev<sup>2</sup>, Shan Sun<sup>3</sup>, Jinzheng Wang<sup>3</sup>, Pengmin Li<sup>1,\*</sup> & Fengwang Ma<sup>1</sup>

<sup>1</sup>*State Key Laboratory of Crop Stress Biology for Arid Areas, College of Horticulture, Northwest A&F University, Yangling, Shaanxi 712100, China*

<sup>2</sup>*Department of Biophysics and Radiobiology, Faculty of Biology, St. Kliment Ohridski University of Sofia, 8 Dr. Tzankov Blvd., 1164 Sofia, Bulgaria*

<sup>3</sup>*Shandong Institute of Pomology, Taian, Shandong 271000, China*

<sup>#</sup>They contributed equally to this work.

\*Corresponding author, Tel. +86 29 87082648; E-mail: Lipm@nwsuaf.edu.cn; Postal address: Taicheng Rd. No. 3, College of Horticulture, Northwest A&F University, Yangling, Shaanxi, 712100, China.

**Supplemental Table 1.** Primers for quantitative Real-time RT-PCR.

| Gene identifier | Gene           | Forward primer  | Reverse primer     |
|-----------------|----------------|-----------------|--------------------|
| EF585293        | <i>PsActin</i> | GCAGACAGGATGAG  | TCTGTTGGAAGGTACTG  |
|                 |                | CAAGGAGATTAC    | AGGGATG            |
| KT601054        | <i>PsPAL</i>   | CCTCCCACAGAAGA  | GCCTGACTCTTTCGTGCT |
|                 |                | ACAAAGCAAG      | CCC                |
| KT597917        | <i>PsCHS</i>   | GCGGACTACCAGCTC | CACACAACAAGAACACG  |
|                 |                | ACCAAG          | AGCAC              |
| KT597918        | <i>PsDFR</i>   | GGCTGACCTGGCGG  | CACTTCGTTCTCGGGGTC |
|                 |                | ACGAG           | TTTGG              |
| KT601053        | <i>PsANS</i>   | GAGTACATCAGACCC | GCCTTCTTCAACTCCTCC |
|                 |                | AAGGAAGAGC      | CTGC               |
| KT597919        | <i>PsUFGT</i>  | CTCCATCAAGCCTAA | ATTGGTGGTGTGGTAGTG |
|                 |                | ACTCTCCC        | TGGTG              |

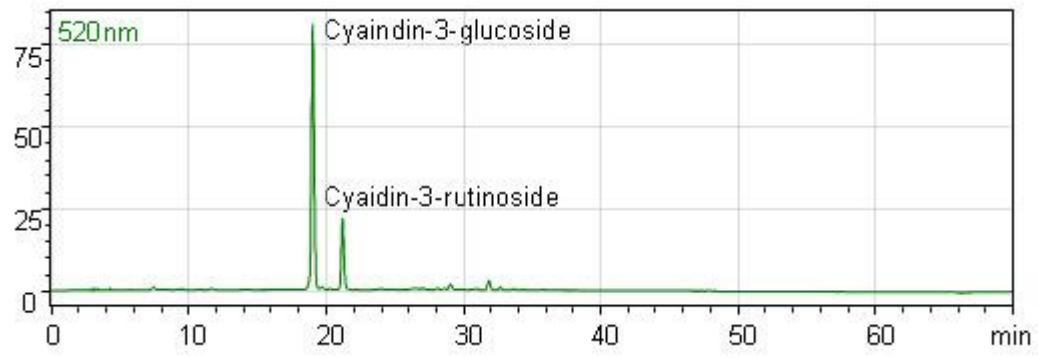

**Supplemental Figure S1.** Chromatogram of anthocyanin compounds in 'Red Beauty' plum fruit.

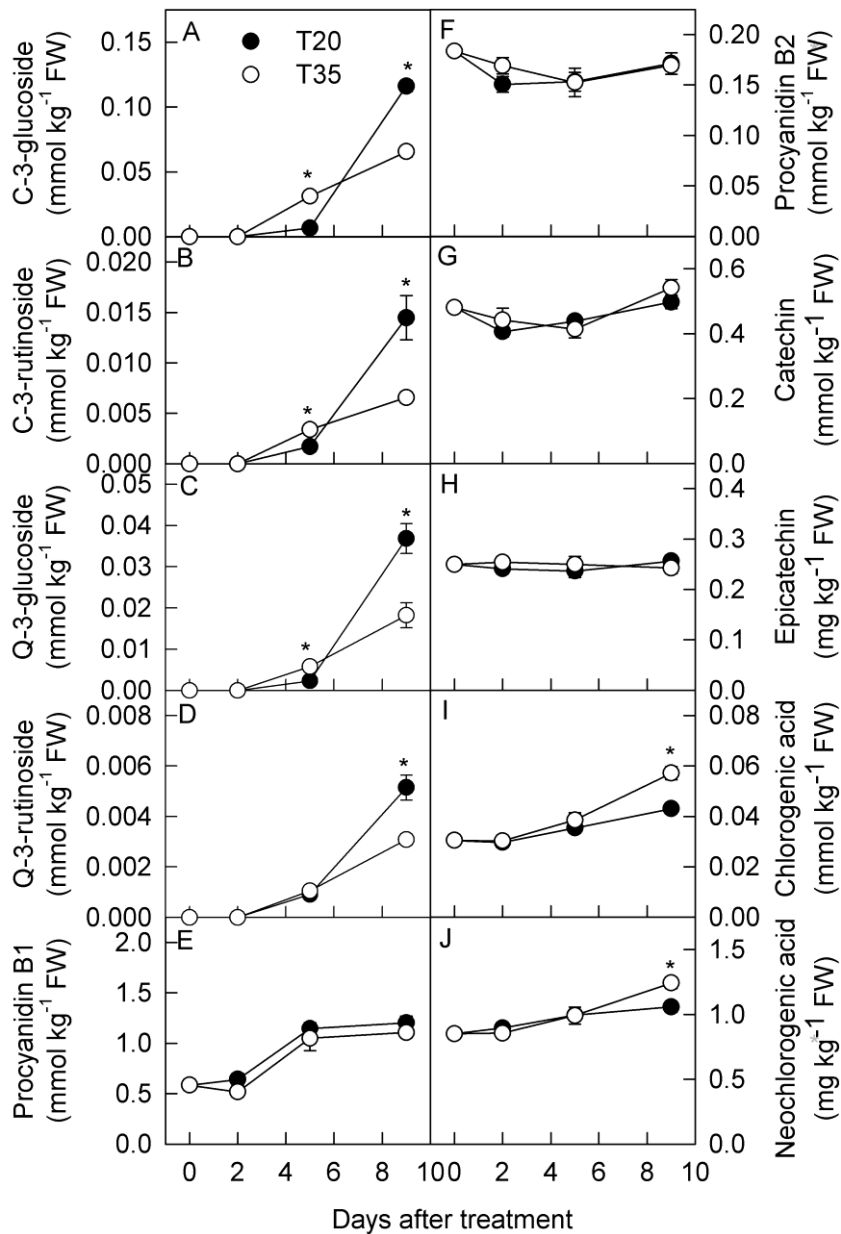

**Supplemental Figure S2.** The concentrations of phenolic compounds in the fleshes of plum fruits treated at 20 °C and 35 °C for different times in the dark. Each data point represents the mean  $\pm$  SE (n = 5). The asterisk indicates a significant difference between two temperature treatments at  $P < 0.05$  using the *t*-test. C-3-glucoside, cyanidin-3-glucoside; C-3-rutinoside, cyanidin-3-rutinoside; Q-3-glucoside, quercetin-3-glucoside; Q-3-rutinoside, quercetin-3-rutinoside.

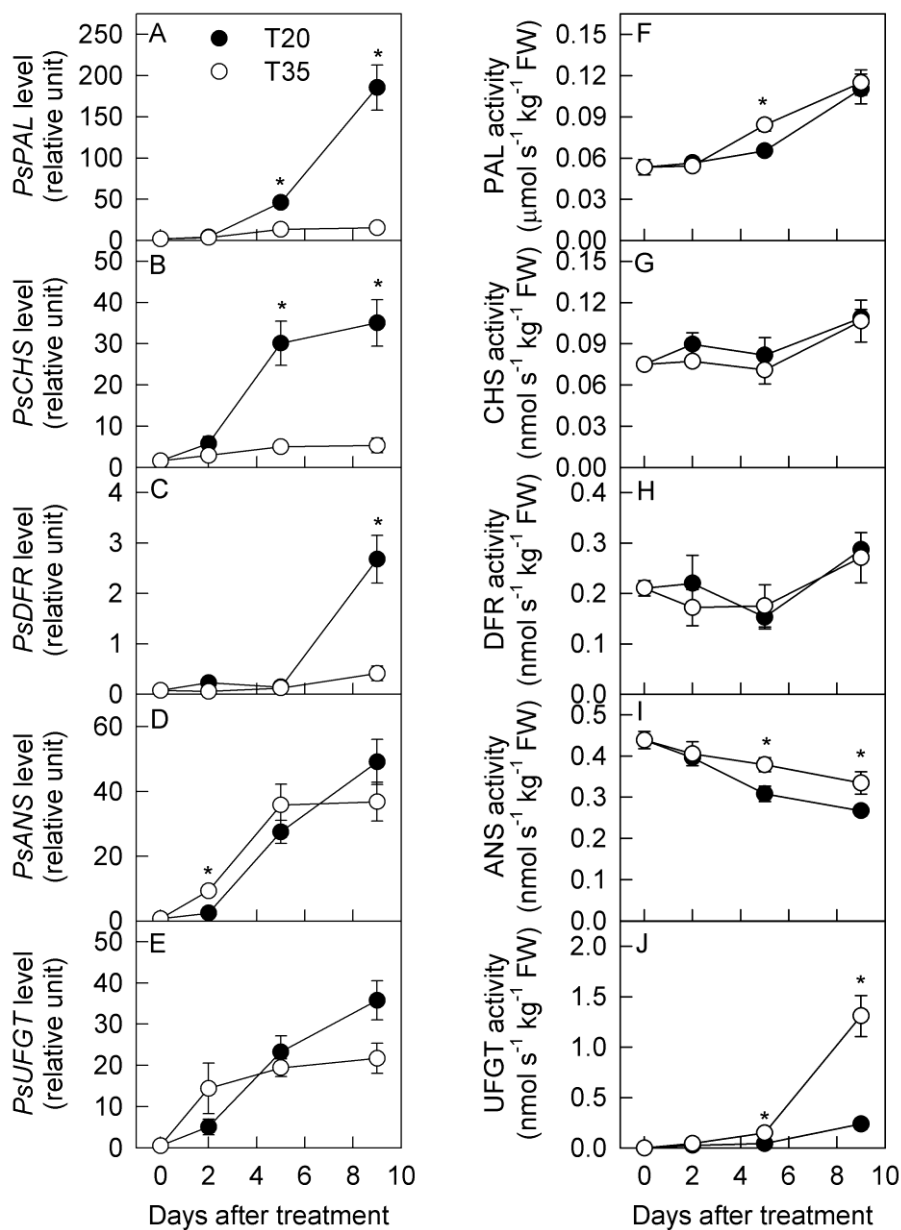

**Supplemental Figure S3.** The transcription levels of key genes and activities of the corresponding encoded enzymes involved in anthocyanin synthesis in plum fruit flesh treated at 20 °C and 35 °C for different times in the dark. Panel A-E, mRNA level; Panel F-J, enzyme activity at 20 °C. Each data point represents the mean ± SE (n = 5). The asterisk indicates a significant difference between two temperature treatments at  $P < 0.05$  using the *t*-test. PAL, phenylalanine ammonia-lyase; CHS, chalcone synthase; DFR,

dihydroflavonol reductase; ANS, anthocyanidin synthase; UFGT, UDP glucose:flavonoid  
3-O-glucosyltransferase.

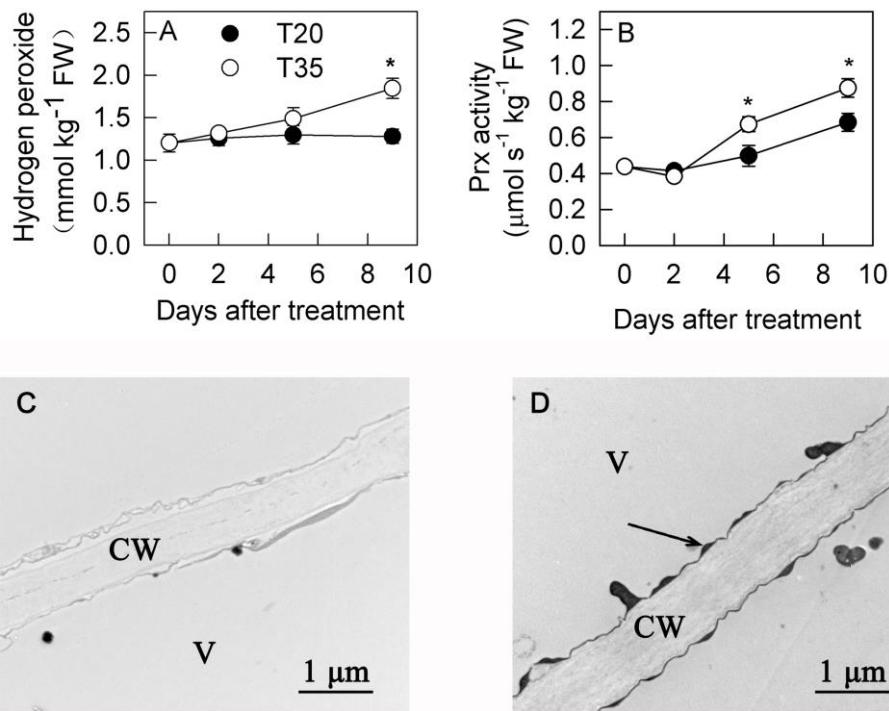

**Supplemental Figure S4.** Hydrogen peroxide concentration and Class III peroxidase (Prx) activity in the flesh of plum fruits treated at 20 °C and 35 °C for different durations in the dark. Panel A, hydrogen peroxide concentration in the flesh during treatments; Panel B, Prx activity in fruit flesh assayed at 20 °C; Panel C and D, cytochemical localization of hydrogen peroxide and Prx activity at 20 °C and 35 °C, respectively. Sections were incubated with CeCl<sub>3</sub>, and the electron-dense deposits represent of both Prx activity and produced hydrogen peroxide in the inner part of the tonoplast (marked with arrows). The vacuolar region is marked with “V”. Bar, 1 μm. Each data point represents the mean ± SE (n = 5) in Panel A and B. The asterisk indicates a significant difference between two temperature treatments at  $P < 0.05$  using the *t*-test.

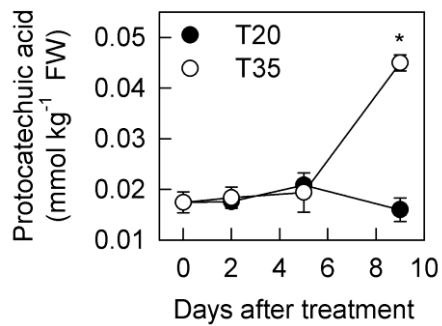

**Supplemental Figure S5.** Concentrations of protocatechuic acid in the fleshes of plum fruits treated at 20 °C and 35 °C for different durations in the dark. Each data point represents the mean  $\pm$  SE ( $n = 5$ ). The asterisk indicates a significant difference between two temperature treatments at  $P < 0.05$  using the  $t$ -test.



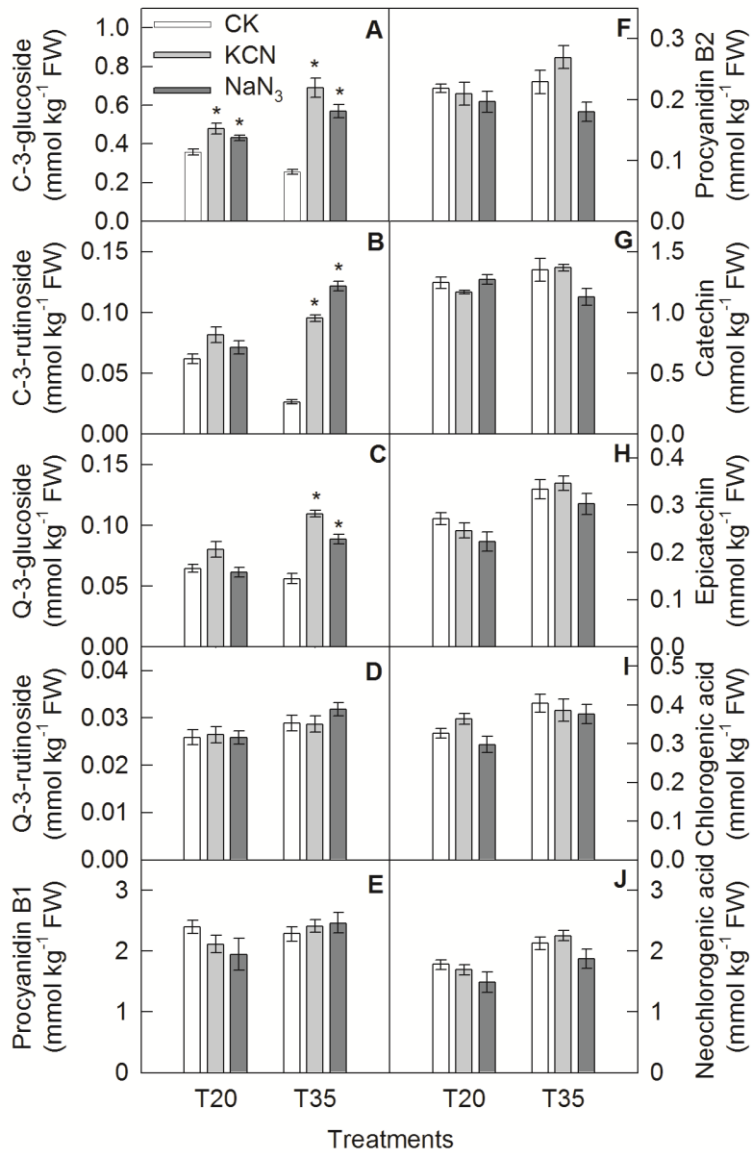

**Supplemental Figure S6.** Concentrations of phenolic compounds in the peels of plum fruits exposed to different treatments in the dark at 20 °C and 35 °C. Each data point represents the mean  $\pm$  SE. The asterisk indicates a significant difference between untreated and treated fruits at each temperature at  $P < 0.05$  using the  $t$ -test.

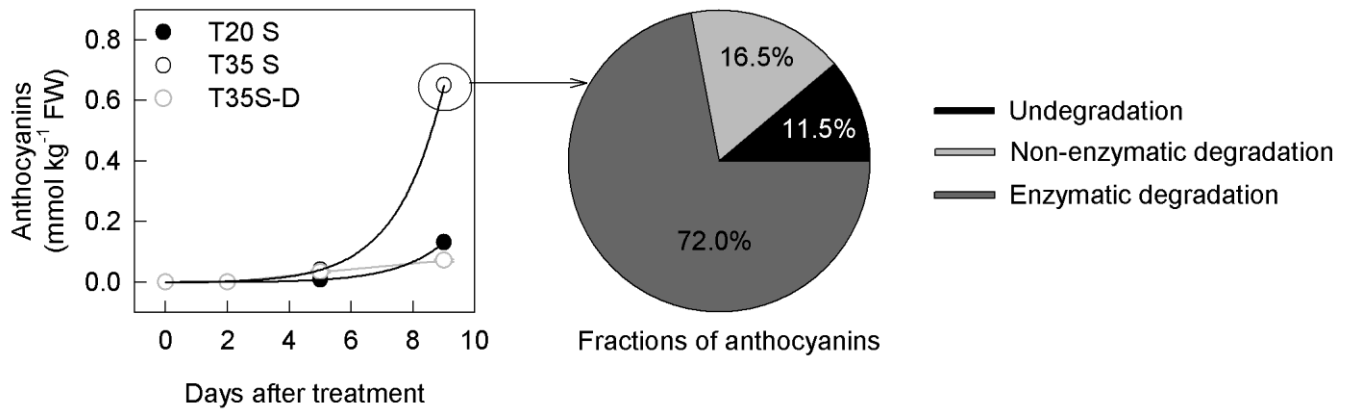

**Supplemental Figure S7.** The concentrations of grossly synthesized anthocyanin in the fleshes of plum fruits treated at 20 °C and 35 °C for different durations in the dark (A) and the fractions of anthocyanins in fruit flesh at 35 °C on day 9 (B).

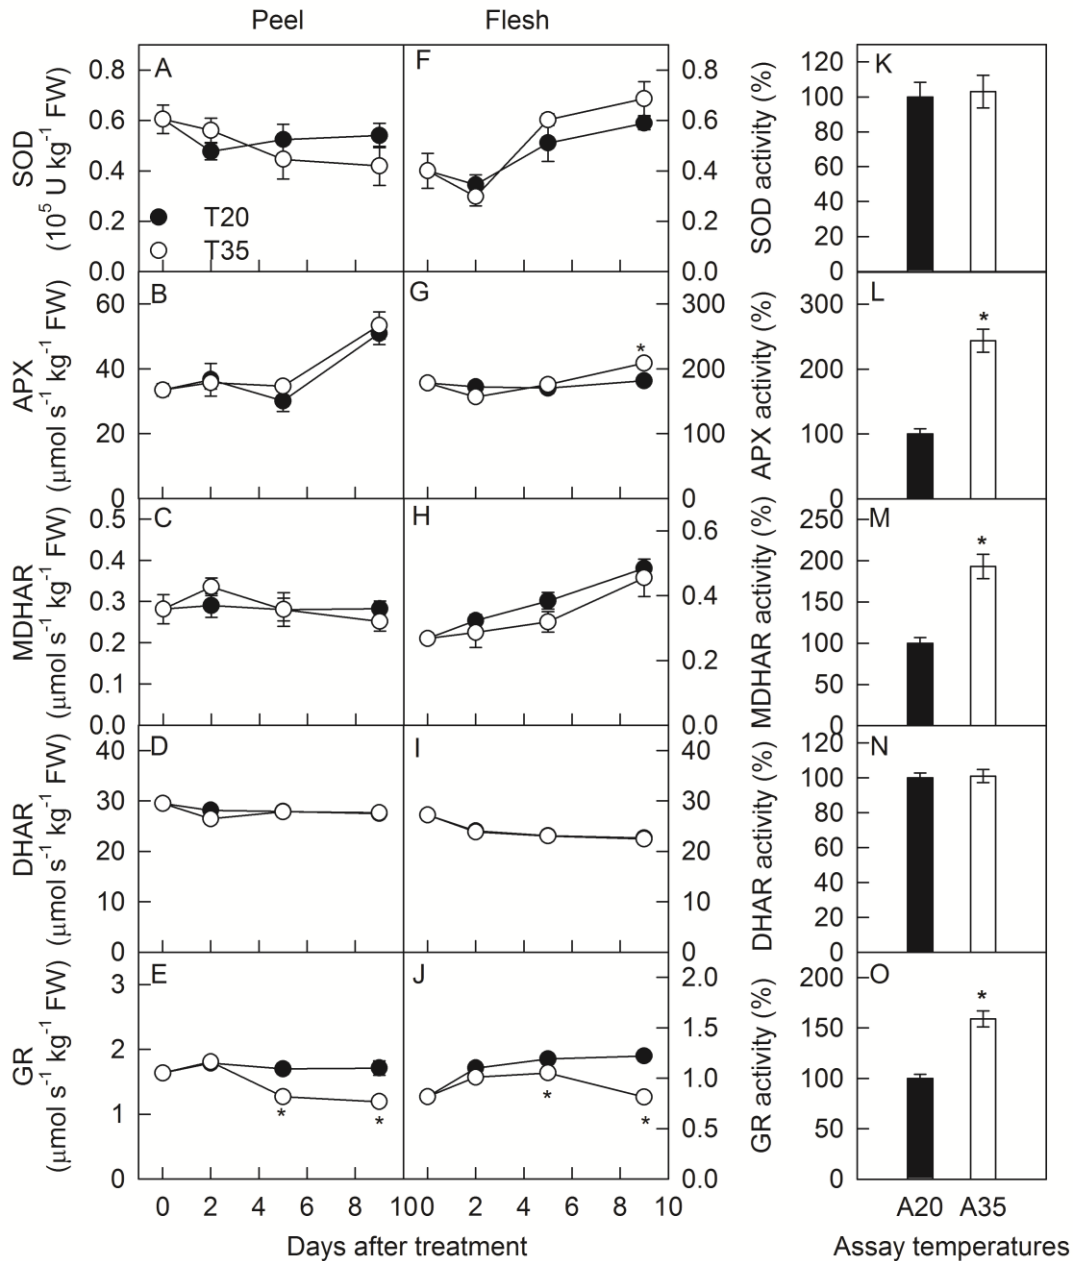

**Supplemental Figure S8.** The activities of superoxide dismutase (SOD), ascorbate peroxidase (APX), monodehydroascorbate dehydrogenase (MDHAR), dehydroascorbate dehydrogenase (DHAR), and glutathione reductase (GR) in the peels or flesh of plum fruits treated at 20 °C and 35 °C for different times in the dark. Panel A-J, enzyme activity at 20 °C; Panel K-O, enzyme activity in fruit treated at 35 °C for 9 days and assayed at 20 °C and 35 °C. Each data point represents the mean  $\pm$  SE (n = 5, A-J; n = 3, K-O). The

asterisk indicates a significant difference between two temperature treatments at  $P < 0.05$  using the  $t$ -test.

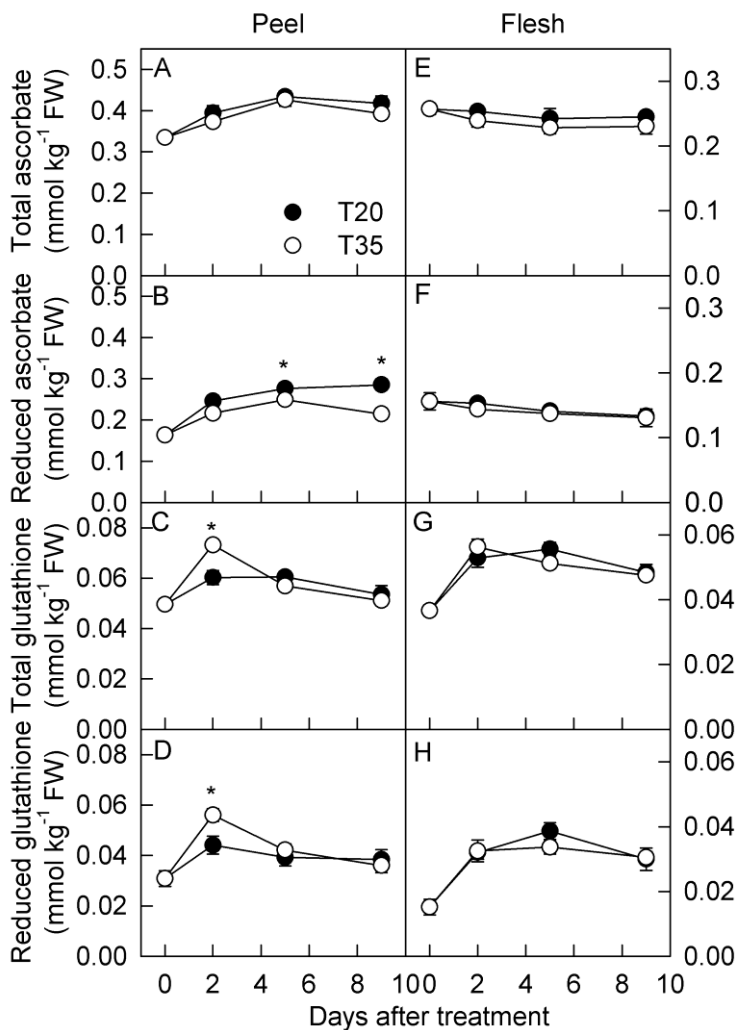

**Supplemental Figure S9.** The concentrations of total ascorbate, reduced ascorbate, total glutathione, and reduced glutathione in the peels and fleshes of plum fruits treated at 20 °C and 35 °C for different times in the dark. Each data point represents the mean  $\pm$  SE (n = 5). The asterisk indicates a significant difference between two temperature treatments at  $P < 0.05$  using the *t*-test.

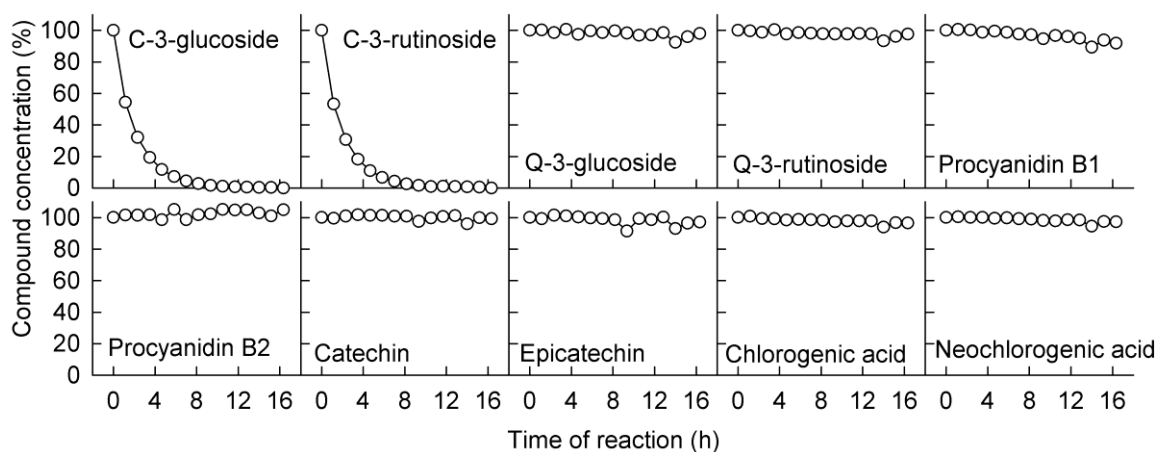

**Supplemental Figure S10.** Changes in the concentrations of different phenolic compounds in the extract of plum fruit peel reacted with hydrogen peroxide.

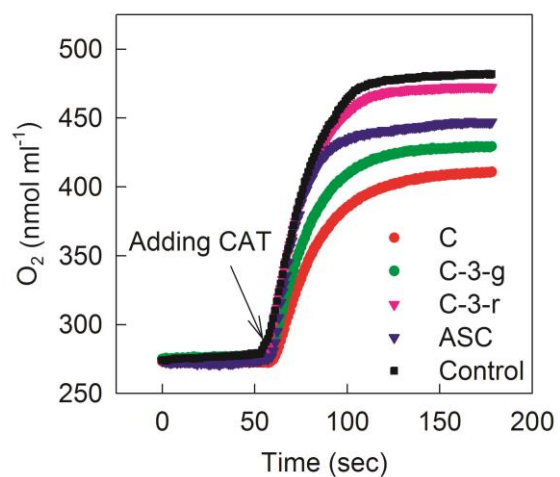

**Supplemental Figure S11.** The antioxidant capacities of reduced ascorbate (ASC), cyanidin-3-glucoside (C-3-g), cyanidin-3-rutinoside (C-3-r), and cyanidin (C) to scavenge hydrogen peroxide. The O<sub>2</sub> evolution represents the residual hydrogen peroxide after reacting with different compounds with same concentrations. Control, water.

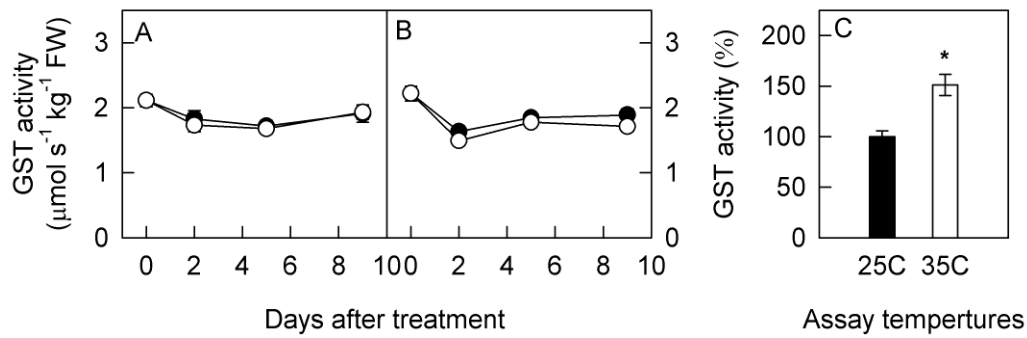

**Supplemental Figure 12.** The activity of glutathione S-transferase (GST) at 20 °C in the peels (A) or fleshes (B) of plum fruits treated at 20 °C and 35 °C for different times in the dark. Panel C, enzyme activity in fruit treated at 35 °C for 9 days and assayed at 20 °C and 35 °C. The asterisk indicates a significant difference between two temperature treatments at  $P < 0.05$  using the *t*-test.
